# Supplementary material for: Effects of Polyethylene Microplastics and Phenanthrene on Soil Properties, Enzyme Activities and Bacterial Communities
Source: MDPI journal article supplement (doi:10.3390/pr10102128), 2022-10-19
Supplement: s1 [file s1]

# Effects of Polyethylene Microplastics and Phenanthrene on Soil Properties, Enzyme Activities and Bacterial Communities

Shasha Liu <sup>1</sup>, Kaibo Huang<sup>2</sup>, Guodong Yuan<sup>1,\*</sup> and Chengfang Yang <sup>3,\*</sup>

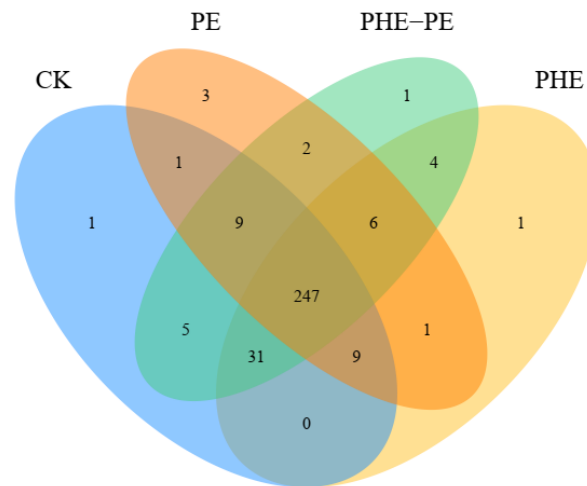

**Figure S1.** Venn diagrams showing the number of bacterial OTUs shared within and between groups of samples

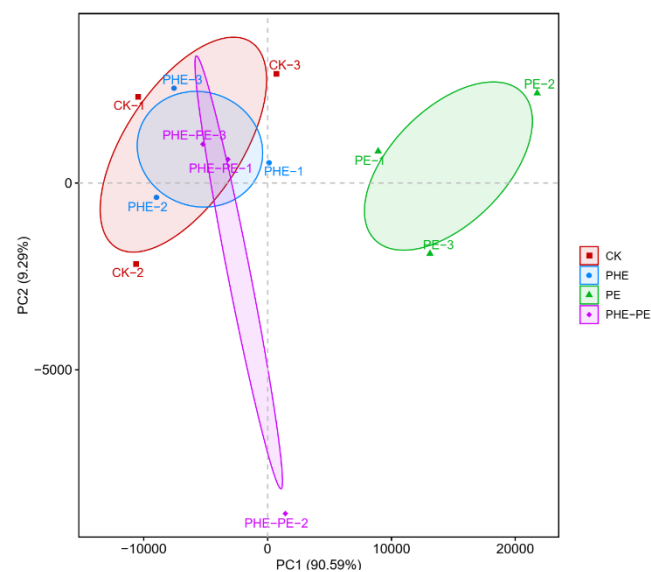

**Figure S2.** PCA plots visualizing the distribution pattern among different treatments (CK, PHE, PE and PHE-PE)

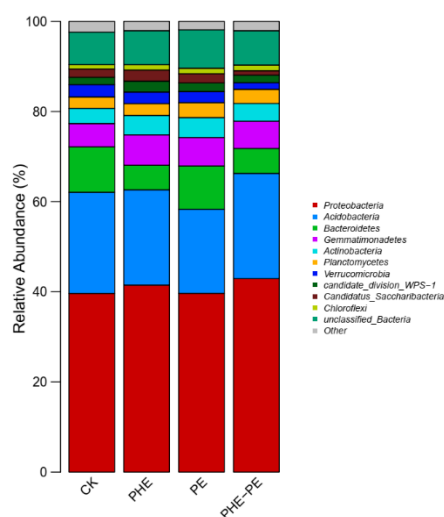

**Figure S3.** Relative abundance of the microbial communities in the different treatments at phylum level

**Table S1** The chemical properties of the tested soil.

| pH          | SOM (g kg <sup>-1</sup> ) | AN (mg kg <sup>-1</sup> ) | AP (mg kg <sup>-1</sup> ) | Total N (mg kg <sup>-1</sup> ) | Total P (mg kg <sup>-1</sup> ) |
|-------------|---------------------------|---------------------------|---------------------------|--------------------------------|--------------------------------|
| 7.433±0.067 | 9.910±0.386               | 39.409±3.901              | 2.451±0.203               | 783.559±27.215                 | 15.864±0.853                   |

**Table S2** Enzymatic activities of the tested soil.

| Urease (mg NH <sub>3</sub> -N g <sup>-1</sup> soil) | FDase (μg FDA g <sup>-1</sup> soil) | Dehydrogenase (μL H <sup>+</sup> 20g <sup>-1</sup> soil) | Phosphatase (mg phenol g <sup>-1</sup> soil) |
|-----------------------------------------------------|-------------------------------------|----------------------------------------------------------|----------------------------------------------|
| 1.932±0.155                                         | 6.576±0.509                         | 3.263±0.451                                              | 0.107±0.022                                  |

**Table S3** Similarity analysis of the Anosim group

| Comparison    | Group Size | ANOSIM statistic R | <i>p</i> | Permutations |
|---------------|------------|--------------------|----------|--------------|
| CK vs PHE     | 2          | 0.185              | 0.3      | 719          |
| CK vs PE      | 2          | 0.222              | 0.2      | 719          |
| CK vs PHE-PE  | 2          | 0.074              | 0.5      | 719          |
| PHE vs PE     | 2          | 0.556              | 0.1      | 719          |
| PHE vs PHE-PE | 2          | 0.259              | 0.3      | 719          |
| PE vs PHE-PE  | 2          | 0.333              | 0.1      | 719          |
